# Supplementary material
Source: publisher site journal article supplement (https://www.dovepress.com/article/309366)
Supplement: Supplementary file 1 [file get_supplementary_file.php]

# Appendix A: Interview topics

## Patients and caregivers

##### Course of the disease and treatments received.

- Moment amputation was discussed for the first time, what was discussed, how this conversation was experienced and if patient/caregiver had insight in impact on life.
- Decision-making process to amputate, difficult or not to talk about amputation, extra conversations with doctors, feelings about the decision, advantages, disadvantages, most important reason to amputate.
- What is important in life, limitations due to disease, goals.
- Did doctors inquire after goals, values and preferences, why or why not in your opinion, was that preferable.
- Information about amputation and rehabilitation.
- Suggestions for improvement in communication.
- Quality of life after amputation.
- Best moment to talk about amputation.

Healthcare professionals

- Typical disease process and treatments.
- When is amputation offered as treatment, what do you tell patients, do you want to discuss it earlier, is it difficult to talk about.
- When do you see amputation as a realistic option in the future for a patient.
- Advantages, disadvantages, most important reason for amputation for patients.
- Information about amputation and rehabilitation.
- Important in life for these patients, limitations due to disease, goals.
- Inquiring after goals, values and preferences.
- Suggestions for improving communication.
- Quality of life after amputation.

Appendix B: Quotes from the interviews Discussing amputations and preferences Patients and caregivers

“**And when did they first talk to you about your leg, that it had to be amputated?** … *That was with*

the necrosis on the stump of my foot [partial foot amputation was previously] … Then they said we must, or it is better to, amputate your lower leg.” Patient 3

“… he [healthcare professional] said ‘it will have to come off eventually [the leg] because we can’t do anything anymore.’ But he left it up to me how and when, unless it would get to severe, then the doctor would decide.”

“**What do you think is the best moment to start talking about amputation with patients?** *Well I think as soon as possible. As long as they [healthcare professionals] clearly state is does not have to happen immediately, but as soon as they see it is a possibility*, that they immediately discuss it.”

##### Patient 5

“Upfront. Some people can’t handle people being upfront, but it is the best way. What do you have to

gain by telling someone via detours they have to be amputated? Nothing. It has to happen.” Patient 6

“If it has to happen in half a year [for example], and you know that already, tell it, talk about it.

People need time to think about it. It think that is how it should be.” Caregiver 3

#### “But doctors in the hospital never inquired after your goals after amputation? *No, not really.*”

##### Patient 6

“**Would you have wanted healthcare professionals [to inquire about goals] …** *I think in that process, if you’re in a process with a rehabilitation period afterwards, then I think that is the job of the rehabilitation physician.*” Patient 3

“No. No, because that’s the job of the rehabilitation physician [discussing goals].” Caregiver 4

“**What did you want to be able to do again after amputation?** The same as everyone. Being able to walk without pain, being able to do stuff without pain, even if it’s going out to eat, that you’re able to walk to the restaurant by yourself. Or you can go out for a night, shopping, walking the dog. So actually the normal stuff everybody does, being able to exercise again. That was all impossible and I hoped to be able to do that again after amputation.” Patient 9

Healthcare professionals

“From the moment there is critical ischemia we tell patients it is important they realise our interventions might not work.” HP 3

“… when you really start to discuss amputation you’re often in a situation in which revascularisation has proven not to have the desirable effect, or the wound progresses after revascularisation, or an uncontrollable infection presents itself. At that moment you very clearly discuss amputation because you think you’re out of options.” HP 2

“I think people that have a high risk at major amputation, even if you haven’t tried revascularisation yet, I always try to hint at amputation in an early stage, and whether that’s discussing it as an

option, I don’t think so. But I always mention it.”

“I don’t really know why not [discussing amputation earlier], I think because I do not think it’s useful.” HP 1

“No I do not think so [on wanting to discuss amputations earlier]. No because, yeah, it could be too early, and you will get stories like ‘they immediately wanted to amputate my leg, but I didn’t let

*them.”* HP 4

“**Do you ask patients what they find important to do in life?** Yes. … What I often ask is indeed what do you [the patient] do on a regular day. Just the regular day-to-day stuff. … And often in that light if amputation is being discussed again, you project that to what they are able to do now and what might be possible after amputation.” HP 3

## Primary reason for amputation

### Patients and caregivers

“**What made you decide to undergo an amputation?** *First, the pain and I was unable to put any weight on it. And all my blood vessels were occluded in my lower leg. … They told me they can sometimes try a bypass, but they told me that would not help.*” Patient 6

“… well take it off, then I’m done with all the problems. I can get a prosthesis fitted and get on [with my life].” Patient 9

“… but at a certain moment it started to hurt so bad I said call the doctor, because I can’t cope with this. I was brought to the hospital … and I laid down there and don’t remember anything since then.

… I remember regaining consciousness, they had performed a viewing operation … and then they said we must amputate your leg.”

“**How did you feel when you made the decision?** *Relieved, happy the pain would go away.*” Patient 4

“**Were there any other reasons you decided to undergo amputation?** *Well no. Yeah that I wouldn’t lose my whole leg.*” Patient 5

### Healthcare professionals

“Because I think they [patients] feel they cannot continue down that road. Either because of the pain or the constant care required for the wounds.” HP 6

“… what I often see is that they [patients] have trouble accepting it, but that there always comes a moment they are ready. But I believe that moment only comes when they feel they have given everything.” HP 6

“**What is the setting in which most patients are amputated here? Is that elective or…** *No most patients come here in an emergency or semi-emergency setting*” HP 4

## Performing amputations sooner

### Patients and caregivers

“**But you would not have wanted to be amputated months earlier?** *No because you think it might pass, you know. Then it went okay and every time something else happened.”* Patient 1

“**Do you think your father would have wanted to be amputated sooner?** *No because I still think he feels bad about losing his leg.*” Caregiver 6

“**In March you heard you had to be amputated would you have wanted that to happen immediately or wait for a while?** *Well look, at that moment I was still able to move, with pain, I wanted to postpone it for as long as possible.*” Patient 5

“**In hindsight, would you have wanted to be amputated earlier?** *Eh yeah, maybe, I don’t really know. At a certain moment you have the idea you’re standing still, that there is no progress. … On the one hand I think I would have liked to be amputated sooner, but on the other hand who says I would have gone as well as it did.*” Patient 9

### Healthcare professionals

“I have the idea that they [patients] say ‘We have tried everything and for that I’m happy. Unfortunately, it didn’t work, and this is now the best I can get, and it made me better’”

“**Do you think it is useful to amputate patients sooner?** *Well, for a few yes, but there will always be patients that slip through the cracks whom you revascularize and where the wound heals, and you can manage with a minor amputation or debridement. So yes, in people where it doesn’t work it is useful to amputate sooner but the difficulty is to predict in which patients that will happen.*” HP 2 “**Do you hear patients saying, in hindsight I should have chosen for an amputation earlier?** *Yes, sometimes. Incidentally I have indeed heard that a few times from patients.*” HP 7
